# Supplementary material for: Heme oxygenase–1 and carbon monoxide suppress autoimmune neuroinflammation
Source: JCI journal article supplement (doi:10.1172/jci28844), 2007-01-26
Supplement: sd1 [file 1]

Chora et. al. Supplementary Figure 1

A

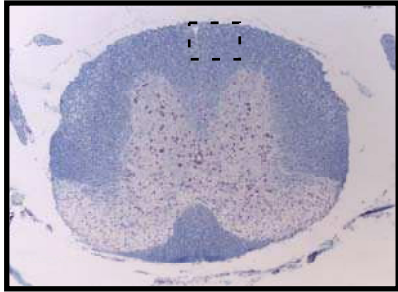

B

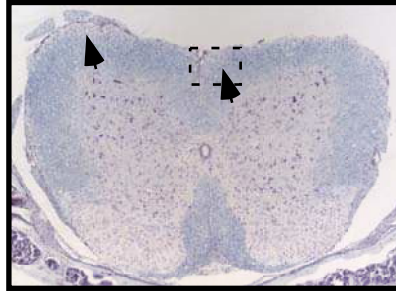

C

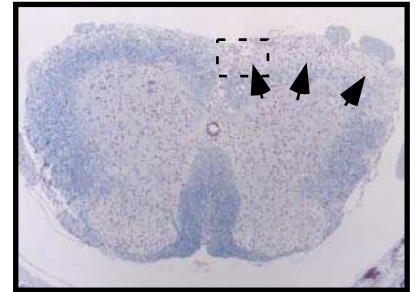

D

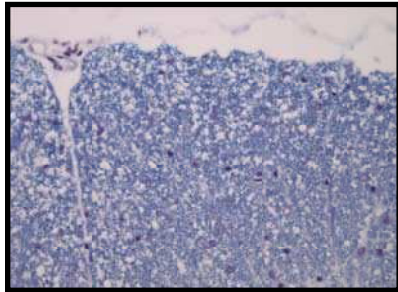

E

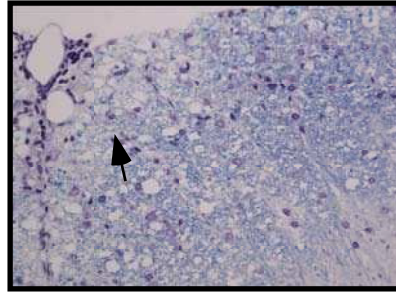

F

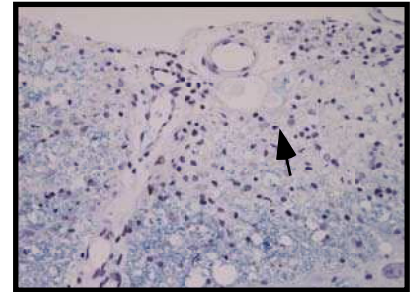

# Chora et. al. Supplemental Figure 2

## A

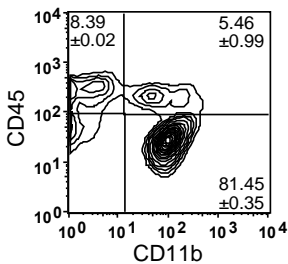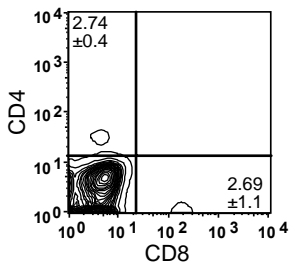

## B

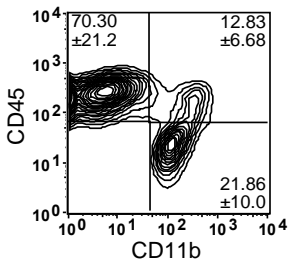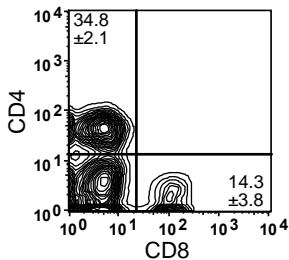

Chora et. al. Supplemental Figure 3

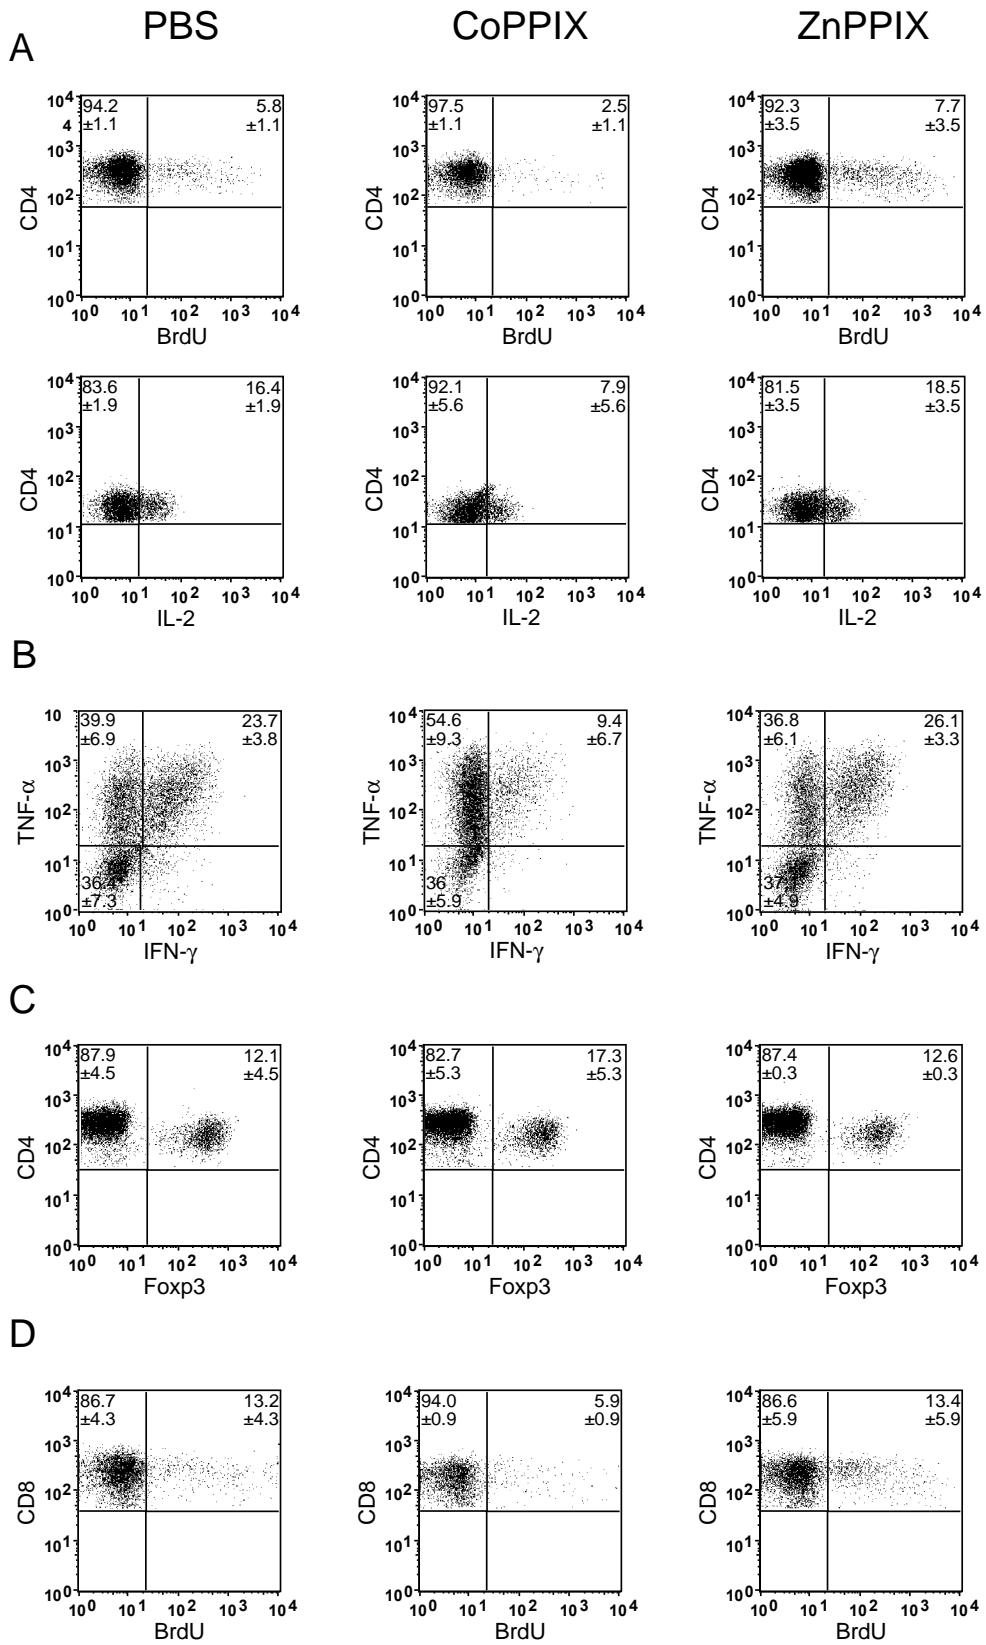

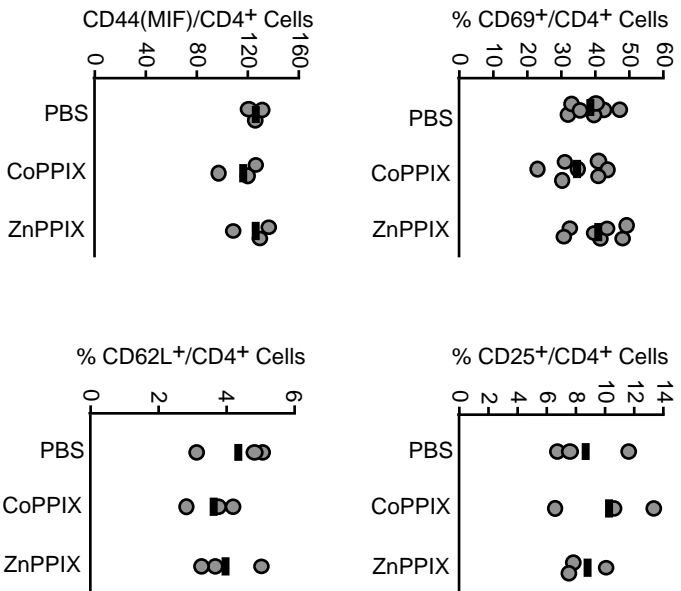

# Chora et. al. Supplemental Figure 5

## A

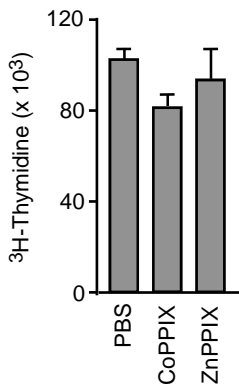

## B

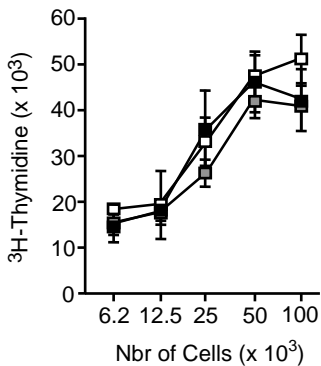

# Chora et. al. Supplemental Figure 6

A

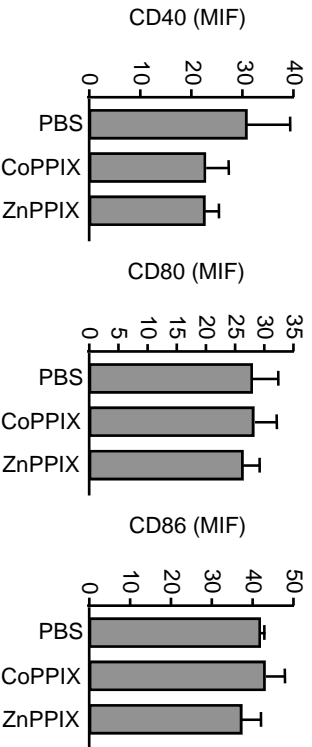

B

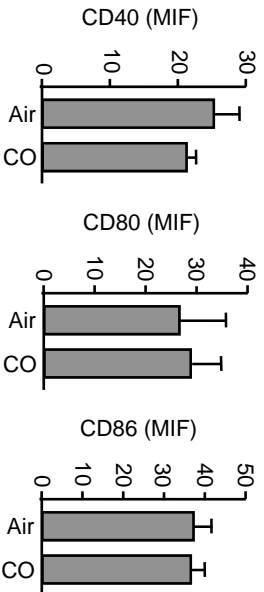

# Chora et al. supplemental Figure 7

## A

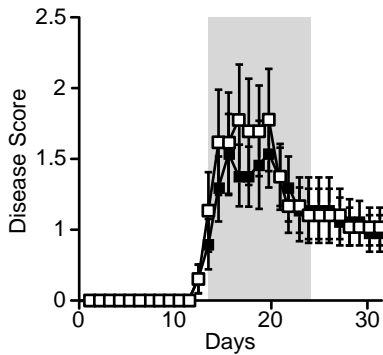

## B

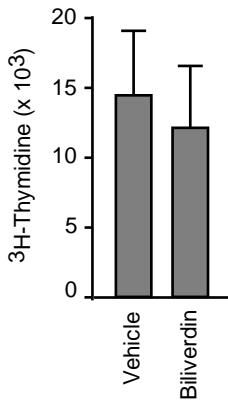

**Supplemental Figure 1 - HO-1 prevents CNS demyelination.** Representative Luxol fast blue staining of spinal cord sections are shown for naïve C57BL/6 mice (A) versus C57BL/6 *hmx-1*<sup>+/+</sup> (B) and *hmx-1*<sup>-/-</sup> (C) mice, 60 days after EAE induction.

Magnifications in A-C are 40x. Dashed rectangles in (A-C) are magnified (400x) in (D-F), respectively. Arrows indicate demyelination.

**Supplemental Figure 2 – CNS leukocyte infiltrates during EAE.** Leukocyte infiltrates were analyzed by flow cytometry in (A) naïve C57BL/6 mice (n=2) or (B) 20 days after immunization. Representative plots are shown with relative percentages of CD45<sup>+</sup>, CD11b<sup>+</sup>, CD4<sup>+</sup> and CD8<sup>+</sup> cells ± standard deviation.

**Supplemental Figure 3 – HO-1 modulates T<sub>H</sub> cell effector function within the CNS.**

EAE was induced in C57BL/6 mice, randomized two days after disease onset and treated daily with PBS, CoPPIX or ZnPPIX,. CNS leukocyte infiltrates were analyzed by flow cytometry, 20 days post-immunization. When indicated, mice received BrdU.

Representative plots are shown with mean percentages ± standard deviation (n=3-10 animals per staining). (A) Staining for intracellular BrdU versus surface CD4 and intracellular IL-2 versus surface CD4. (B) Staining for intracellular TNF-α versus intracellular IFN-γ is shown in CD4<sup>+</sup> T<sub>H</sub> cells. (C) Staining for intracellular FoxP3 versus surface CD4. (D) Staining for intracellular BrdU versus surface CD8.

**Supplemental Figure 4 – Induction of HO-1 does not modulate the expression of activation markers in T<sub>H</sub> cells within the CNS.** EAE was induced in C57BL/6 mice,



randomized two days after disease onset and treated daily with PBS, CoPPIX or ZnPPIX. Leukocyte infiltrates in the CNS were analyzed by flow cytometry, 20 days post-immunization. Each value represents an individual animal. Relative percentage of CD69<sup>+</sup>/CD4<sup>+</sup> T<sub>H</sub> cells, CD25<sup>+</sup>/CD4<sup>+</sup> T<sub>H</sub> cells and CD62L<sup>+</sup>/CD4<sup>+</sup> T<sub>H</sub> cells are shown. For CD44 the mean fluorescence intensity of CD44 is shown in CD4<sup>+</sup> T<sub>H</sub> cells. Bars indicate mean value of all mice analyzed under each treatment.

**Supplemental Figure 5 – Induction of HO-1 does not suppress naïve myelin-reactive**

**T<sub>H</sub> cell priming.** C57BL/6 mice were immunized in the footpad with MOG<sub>35-55</sub> plus CFA and treated daily with PBS (n=3), CoPPIX (n=3) or ZnPPIX (n=3). Lymph node cells were isolated 8 days post-immunization. (A) T<sub>H</sub> cell proliferation was measured in vitro by <sup>3</sup>H-Thymidine incorporation, 72 hours after addition of concanavalin A (2 µg/ml).

Results shown are the mean ± standard deviation of one representative assay out of five.

(B) Increasing numbers of T<sub>H</sub> cells (>98% CD4<sup>+</sup> T cells) from PBS- (□) (n=3), CoPPIX-

(■) (n=3) or ZnPPIX- (▣) (n=3) treated mice were co-cultured with T<sub>H</sub> cell-depleted

lymph node cells (<98% CD4<sup>+</sup> T cells) from immunized but otherwise untreated mice.

MOG<sub>35-55</sub>-specific T<sub>H</sub> cell proliferation was measured as in (A). Results shown are the

mean ± standard deviation.

**Supplemental Figure 6 – Induction of HO-1 does not modulate the expression of co-**

**stimulatory molecules in APC.** C57BL/6 mice were immunized in the footpad with

MOG<sub>35-55</sub> plus CFA and (A) treated daily with PBS (n=4), CoPPIX (n=6), ZnPPIX (n=6),

(B) exposed to air (n=6) or CO (n=7). Draining lymph node cells were isolated 8 days

after immunization and CD40, CD80 or CD86 surface expression in DC (CD11c<sup>+</sup>) was analyzed by flow cytometry. Quantifications (mean intensity of fluorescence; MIF) are shown as mean  $\pm$  standard deviation.

**Supplemental Figure 7 – Biliverdin does not suppress EAE progression nor does it suppress the proliferation of myelin-reactive T<sub>H</sub> cells.** (A) EAE was induced, mice were randomized two days after disease onset and treated daily with biliverdin (■)(n=15) or vehicle (□)(n=15) for the period indicated by the shaded area. Daily clinical scores are shown as mean  $\pm$  standard error of mean. (B) C57BL/6 mice were immunized in the footpad with MOG<sub>35-55</sub> plus CFA and treated daily with biliverdin (n=3) or vehicle (n=3), starting two days prior to immunization. Draining lymph node cells were isolated 8 days post-immunization and myelin-reactive T<sub>H</sub> cell proliferation was assessed in vitro by <sup>3</sup>H-thymidine incorporation, 72 hours after addition of MOG<sub>35-55</sub> (10  $\mu$ g/ml). Results shown are the mean  $\pm$  standard deviation from one assay with five independently treated animals per group.
